# Supplementary material for: Pericyte-Specific Secretome Profiling in Hypoxia Using TurboID in a Multicellular in Vitro Spheroid Model
Source: PubMed Central journal article supplement — Mol Cell Proteomics. 2024 May 4;23(6):100782. doi: 10.1016/j.mcpro.2024.100782 (PMC11176767; doi:10.1016/j.mcpro.2024.100782), 2024-05-04
Supplement: mmc3.pdf [file mmc3.pdf]

Supplemental Table S2. Session info describing fgSEA gene set enrichment analysis using the Hallmark database

```
> sessionInfo()
R version 4.2.2 (2022-10-31)
Platform: x86_64-apple-darwin17.0 (64-bit)
Running under: macOS Monterey 12.3

Matrix products: default
LAPACK: /Library/Frameworks/R.framework/Versions/4.2/Resources/lib/libRlapack.dylib
```

```
locale:
[1] en_US.UTF-8/en_US.UTF-8/en_US.UTF-8/C/en_US.UTF-8/en_US.UTF-8
```

```
attached base packages:
[1] grid      stats4    stats     graphics  grDevices  utils
     datasets  methods  base
```

```
other attached packages:
 [1] factoextra_1.0.7           UCell_2.2.0
biomaRt_2.54.0             Matrix_1.5-3
 [5] hdf5r_1.3.7                SeuratObject_4.1.3
Seurat_4.3.0              VennDiagram_1.7.3
 [9] futile.logger_1.4.3       gdata_2.18.0.1
colorRamps_2.3.1         fgsea_1.24.0
[13] msigdb_7.5.1              forcats_0.5.2
stringr_1.5.0            purrr_0.3.5
[17] readr_2.1.3               tidyr_1.2.1
tidyverse_1.3.2          tibble_3.1.8
[21] RColorBrewer_1.1-3        plots_3.1.3
EnhancedVolcano_1.16.0   ggrepel_0.9.2
[25] ggplot2_3.4.0            dplyr_1.0.10
msImpute_1.8.0          reticulate_1.26
[29] proDA_1.12.0             limma_3.54.0
DEP_1.20.0              SummarizedExperiment_1.28.0
[33] Biobase_2.58.0           GenomicRanges_1.50.1
GenomeInfoDb_1.34.4     IRanges_2.32.0
[37] S4Vectors_0.36.1        BiocGenerics_0.44.0
MatrixGenerics_1.10.0   matrixStats_0.63.0
```

```
loaded via a namespace (and not attached):
 [1] rappdirs_0.3.3           scattermore_0.8
bit64_4.0.5              irlba_2.3.5.1
 [5] DelayedArray_0.24.0     data.table_1.14.6
KEGGREST_1.38.0         RCurl_1.98-1.9
 [9] doParallel_1.0.17       generics_0.1.3
preprocessCore_1.60.0   ScaledMatrix_1.6.0
[13] cowplot_1.1.1          lambda.r_1.2.4
RSQLite_2.2.19         RANN_2.6.1
[17] future_1.29.0          bit_4.0.5
tzdb_0.3.0             spatstat.data_3.0-0
[21] xml2_1.3.3             lubridate_1.9.0
httpuv_1.6.6          assertthat_0.2.1
```

|                                  |                           |
|----------------------------------|---------------------------|
| [25] gargle_1.2.1                | hms_1.1.2                 |
| babelgene_22.9                   | promises_1.2.0.1          |
| [29] progress_1.2.2              | fansi_1.0.3               |
| caTools_1.18.2                   | dbplyr_2.2.1              |
| [33] readxl_1.4.1                | igraph_1.3.5              |
| DBI_1.1.3                        | htmlwidgets_1.5.4         |
| [37] spatstat.geom_3.0-3         | googledrive_2.0.0         |
| ellipsis_0.3.2                   | ggpubr_0.5.0              |
| [41] backports_1.4.1             | deldir_1.0-6              |
| sparseMatrixStats_1.10.0         | vctrs_0.5.1               |
| [45] SingleCellExperiment_1.20.0 | imputeLCMD_2.1            |
| ROCR_1.0-11                      | abind_1.4-5               |
| [49] cachem_1.0.6                | withr_2.5.0               |
| progressr_0.11.0                 | sctransform_0.3.5         |
| [53] prettyunits_1.1.1           | scraper_1.26.0            |
| goftest_1.2-3                    | softImpute_1.4-1          |
| [57] cluster_2.1.4               | lazyeval_0.2.2            |
| crayon_1.5.2                     | spatstat.explore_3.0-5    |
| [61] edgeR_3.40.0                | pkgconfig_2.0.3           |
| labeling_0.4.2                   | nlme_3.1-160              |
| [65] ProtGenerics_1.30.0         | rlang_1.0.6               |
| globals_0.16.2                   | lifecycle_1.0.3           |
| [69] miniUI_0.1.1.1              | sandwich_3.0-2            |
| filelock_1.0.2                   | affyio_1.68.0             |
| [73] BiocFileCache_2.6.0         | modelr_0.1.10             |
| rsvd_1.0.5                       | polyclip_1.10-4           |
| [77] cellranger_1.1.0            | lmtest_0.9-40             |
| carData_3.0-5                    | zoo_1.8-11                |
| [81] reprex_2.0.2                | ggribbles_0.5.4           |
| GlobalOptions_0.1.2              | googlesheets4_1.0.1       |
| [85] viridisLite_0.4.1           | png_0.1-8                 |
| rjson_0.2.21                     | mzR_2.32.0                |
| [89] bitops_1.0-7                | shinydashboard_0.7.2      |
| KernSmooth_2.23-20               | Biostrings_2.66.0         |
| [93] blob_1.2.3                  | DelayedMatrixStats_1.20.0 |
| shape_1.4.6                      | spatstat.random_3.0-1     |
| [97] parallelly_1.32.1           | rstatix_0.7.1             |
| ggsignif_0.6.4                   | tmvtnorm_1.5              |
| [101] beachmat_2.14.0            | scales_1.2.1              |
| memoise_2.0.1                    | magrittr_2.0.3            |
| [105] plyr_1.8.8                 | ica_1.0-3                 |
| zlibbioc_1.44.0                  | compiler_4.2.2            |
| [109] dqrng_0.3.0                | pcaMethods_1.90.0         |
| clue_0.3-63                      | fitdistrplus_1.1-8        |
| [113] cli_3.4.1                  | affy_1.76.0               |
| XVector_0.38.0                   | listenv_0.8.0             |
| [117] pbapply_1.6-0              | patchwork_1.1.2           |
| formatR_1.12                     | MASS_7.3-58.1             |
| [121] tidyselect_1.2.0           | vsn_3.66.0                |
| stringi_1.7.8                    | BiocSingular_1.14.0       |
| [125] locfit_1.5-9.6             | norm_1.0-10.0             |
| MALDIquant_1.22                  | fastmatch_1.1-3           |
| [129] tools_4.2.2                | timechange_0.1.1          |
| future.apply_1.10.0              | parallel_4.2.2            |

|                              |                      |
|------------------------------|----------------------|
| [133] circlize_0.4.15        | rstudioapi_0.14      |
| MsCoreUtils_1.10.0           | bluster_1.8.0        |
| [137] foreach_1.5.2          | gridExtra_2.3        |
| metapod_1.6.0                | farver_2.1.1         |
| [141] mzID_1.36.0            | Rtsne_0.16           |
| digest_0.6.30                | BiocManager_1.30.19  |
| [145] FNN_1.1.3.1            | shiny_1.7.3          |
| Rcpp_1.0.9                   | car_3.1-1            |
| [149] broom_1.0.1            | scuttle_1.8.1        |
| later_1.3.0                  | RcppAnnoy_0.0.20     |
| [153] ncd4_1.2.0             | AnnotationDbi_1.60.0 |
| httr_1.4.4                   | MSnbase_2.24.0       |
| [157] ComplexHeatmap_2.14.0  | colorspace_2.0-3     |
| tensor_1.5                   | rvest_1.0.3          |
| [161] XML_3.99-0.13          | fs_1.5.2             |
| splines_4.2.2                | uwot_0.1.14          |
| [165] statmod_1.4.37         | spatstat.utils_3.0-1 |
| sp_1.5-1                     | gmm_1.7              |
| [169] plotly_4.10.1          | xtable_1.8-4         |
| jsonlite_1.8.4               | futile.options_1.0.1 |
| [173] R6_2.5.1               | pillar_1.8.1         |
| htmltools_0.5.4              | mime_0.12            |
| [177] glue_1.6.2             | fastmap_1.1.0        |
| DT_0.26                      | BiocParallel_1.32.4  |
| [181] BiocNeighbors_1.16.0   | codetools_0.2-18     |
| mvtnorm_1.1-3                | utf8_1.2.2           |
| [185] spatstat.sparse_3.0-0  | lattice_0.20-45      |
| curl_4.3.3                   | leiden_0.4.3         |
| [189] gtools_3.9.4           | survival_3.4-0       |
| munsell_0.5.0                | GetoptLong_1.0.5     |
| [193] GenomeInfoDbData_1.2.9 | iterators_1.0.14     |
| impute_1.72.1                | reshape2_1.4.4       |
| [197] haven_2.5.1            | gtable_0.3.1         |
